# Supplementary material for: Regulation of the coordination number of Zn single atoms to boost electrochemical sensing of H 2 O 2
Source: Royal Society of Chemistry journal article supplement (doi:10.1039/d4nr03815k), 2024-11-28
Supplement: d4nr03815k1.pdf [file d4nr03815k1.pdf]

## Regulation of the coordination number of Zn single atoms to boost electrochemical sensing of H<sub>2</sub>O<sub>2</sub>

Ziyin Yang\*, Yaqi Kong, Chengcheng Qi\*

School of Chemistry and Chemical Engineering, Qufu Normal University, P. R. China.

E-mail address: [1271627739@qq.com](mailto:1271627739@qq.com)

Table S1 Zn elemental analysis results for Zn-N<sub>3</sub>/NC and Zn-N<sub>4</sub>/NC by AAS

| Samples               | Elemental | AAS      |
|-----------------------|-----------|----------|
| Zn-N <sub>3</sub> /NC | Zn        | 0.76 wt% |
| Zn-N <sub>4</sub> /NC | Zn        | 2.58 wt% |

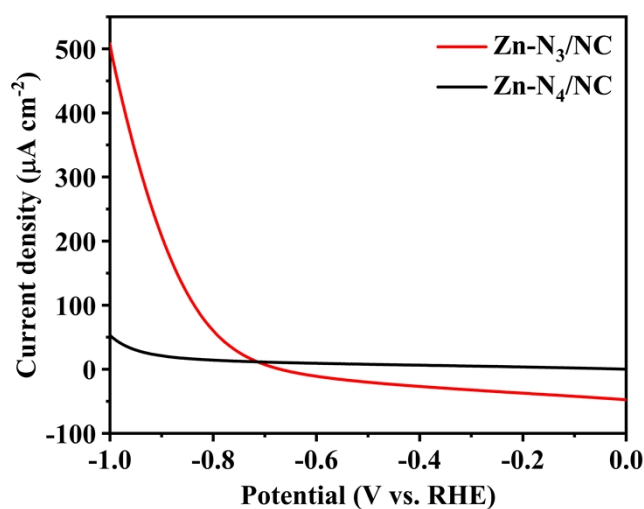

Figure S1. LSV curves of Zn-N<sub>4</sub>/NC and Zn-N<sub>3</sub>/NC in PBS (pH = 7.2)

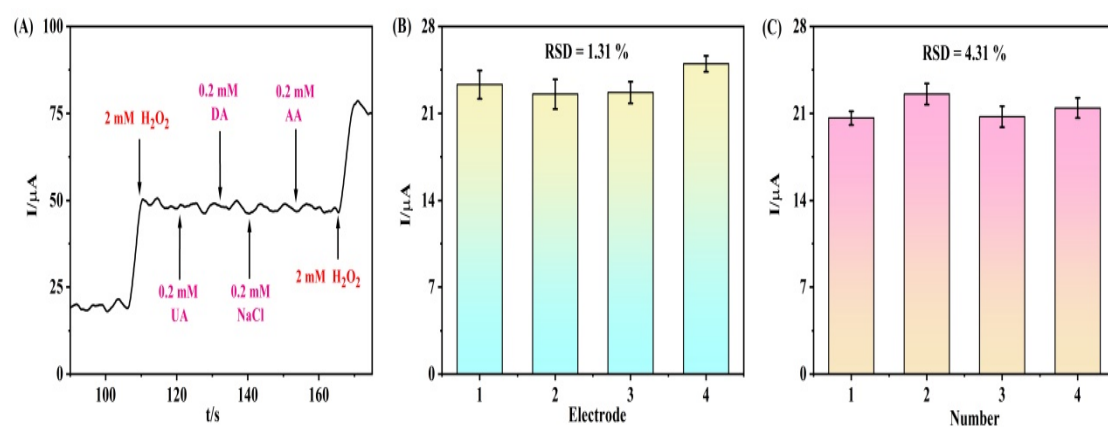

Figure S2 (A) Current response of Zn-N<sub>3</sub>/NC/GCE to H<sub>2</sub>O<sub>2</sub> and interference in a PBS solution (pH = 7.2) at -0.2 V; (B) current response of four independent Zn-N<sub>3</sub>/NC/GCEs to 2 mM H<sub>2</sub>O<sub>2</sub> in a PBS solution (pH = 7.2) at -0.2 V; (C) current response of the same Zn-N<sub>3</sub>/NC/GCE to 2 mM H<sub>2</sub>O<sub>2</sub> in a PBS solution (pH = 7.2) at -0.2 V
